# Supplementary material for: Preparation of Al/Fe-Pillared Clays: Effect of the Starting Mineral
Source: MDPI journal article supplement (doi:10.3390/ma10121364), 2017-11-28
Supplement: s1 [file s1]

# Preparation of Al/Fe-Pillared Clays: Effect of the Starting Mineral

Helir-Joseph Muñoz <sup>1</sup>, Carolina Blanco <sup>2</sup>, Antonio Gil <sup>3</sup>, Miguel-Ángel Vicente <sup>4</sup>  
and Luis-Alejandro Galeano <sup>1,\*</sup>

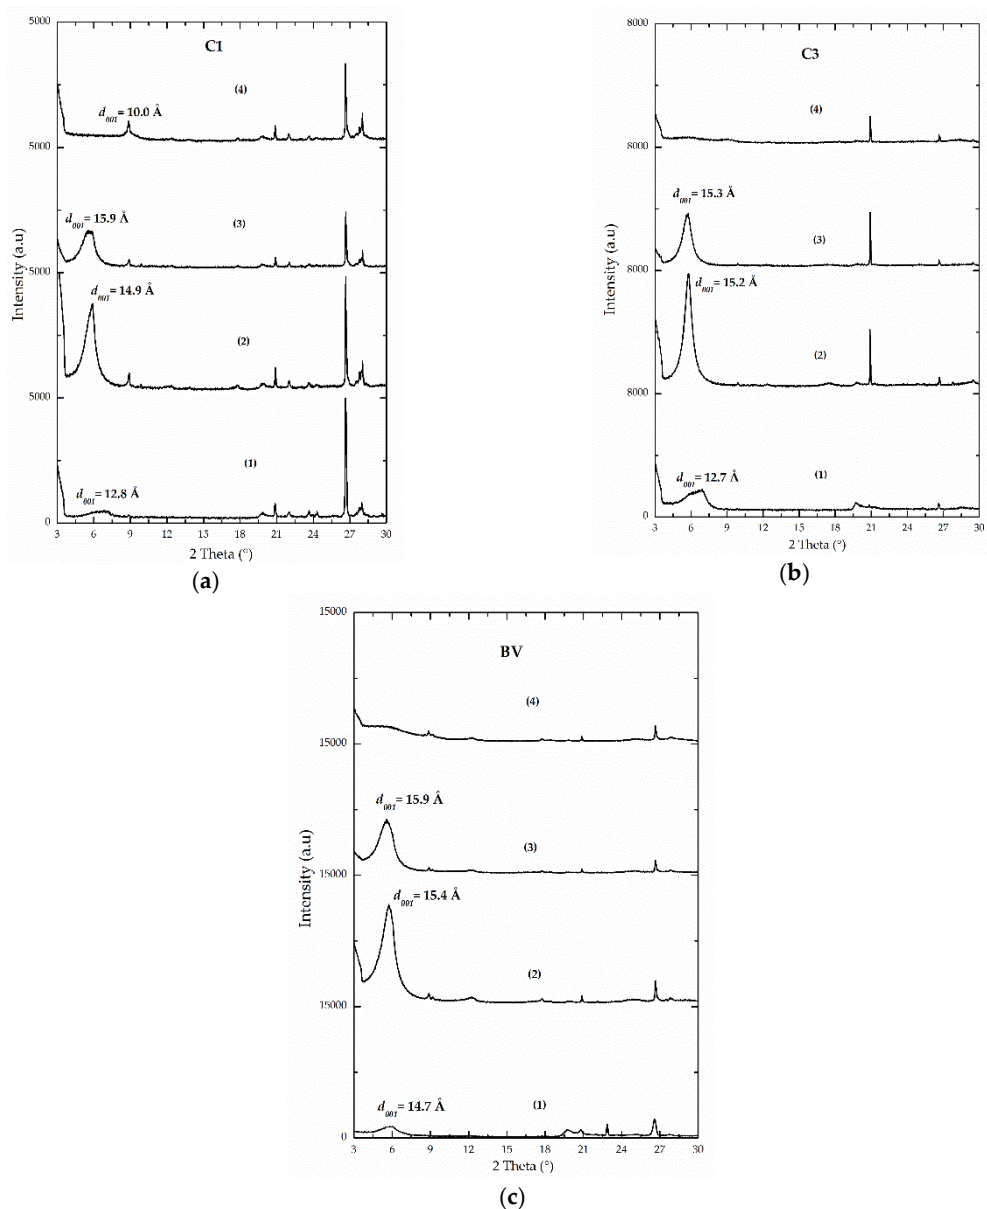

**Figure S1.** X-ray diffraction patterns of raw minerals in oriented films: (a) C1, (b) C3 and (c) BV, under following conditions: (1) untreated, (2)  $\text{Ca}^{2+}$ -homoionized, (3) saturated with ethylene glycol and (4) calcined at  $400 \text{ °C}/2 \text{ h}$ .

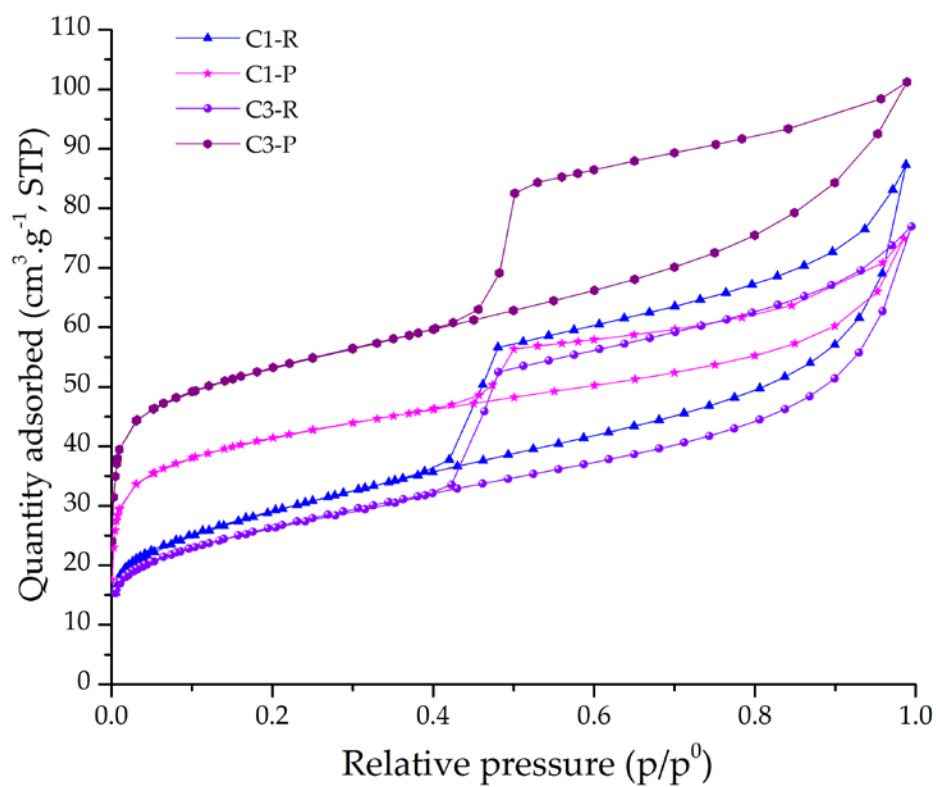

**Figure S2.** Nitrogen adsorption-desorption isotherms of refined and pillared forms of C1 and C3 clays.

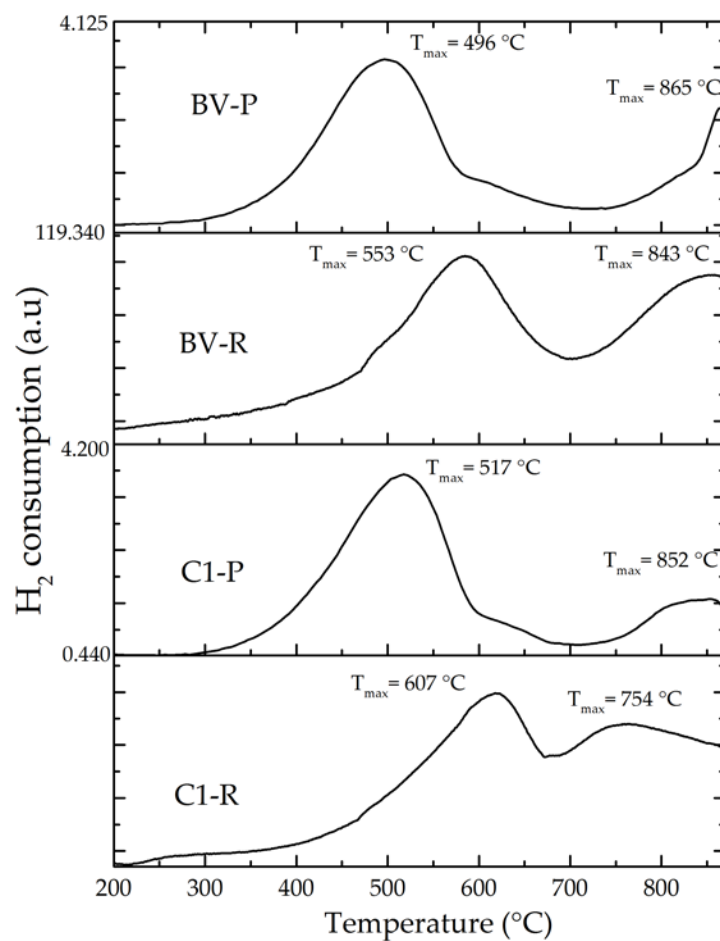

**Figure S3.** Hydrogen–temperature programmed reduction (H<sub>2</sub>–TPR) diagrams of refined (R) and pillared forms of clays C1 and BV.
